# Supplementary material for: The Yellow Stripe-Like (YSL) Gene Functions in Internal Copper Transport in Peanut
Source: MDPI journal article supplement (doi:10.3390/genes9120635), 2018-12-14
Supplement: s1 [file s1]

Supplementary data

Supplementary Fig. S1

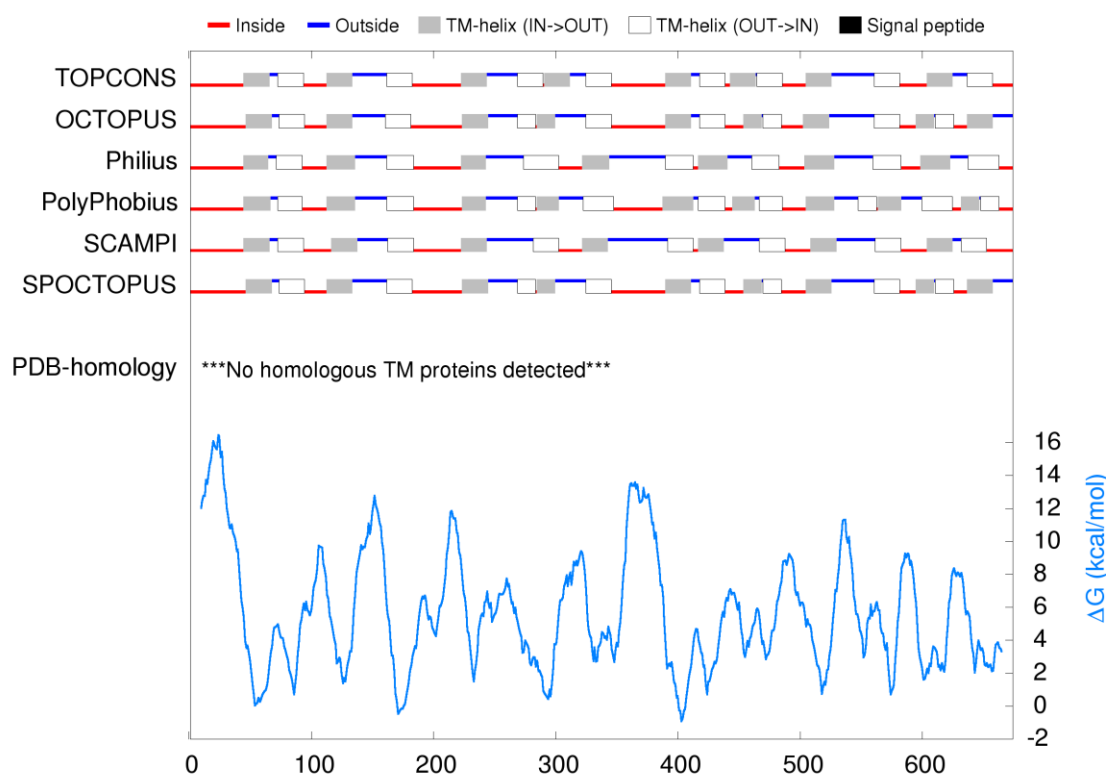

Supplementary Fig. S1 The predicted membrane protein topology and signal peptide of AhYSL3.1 based on different methods.

Supplementary Fig. S2

A

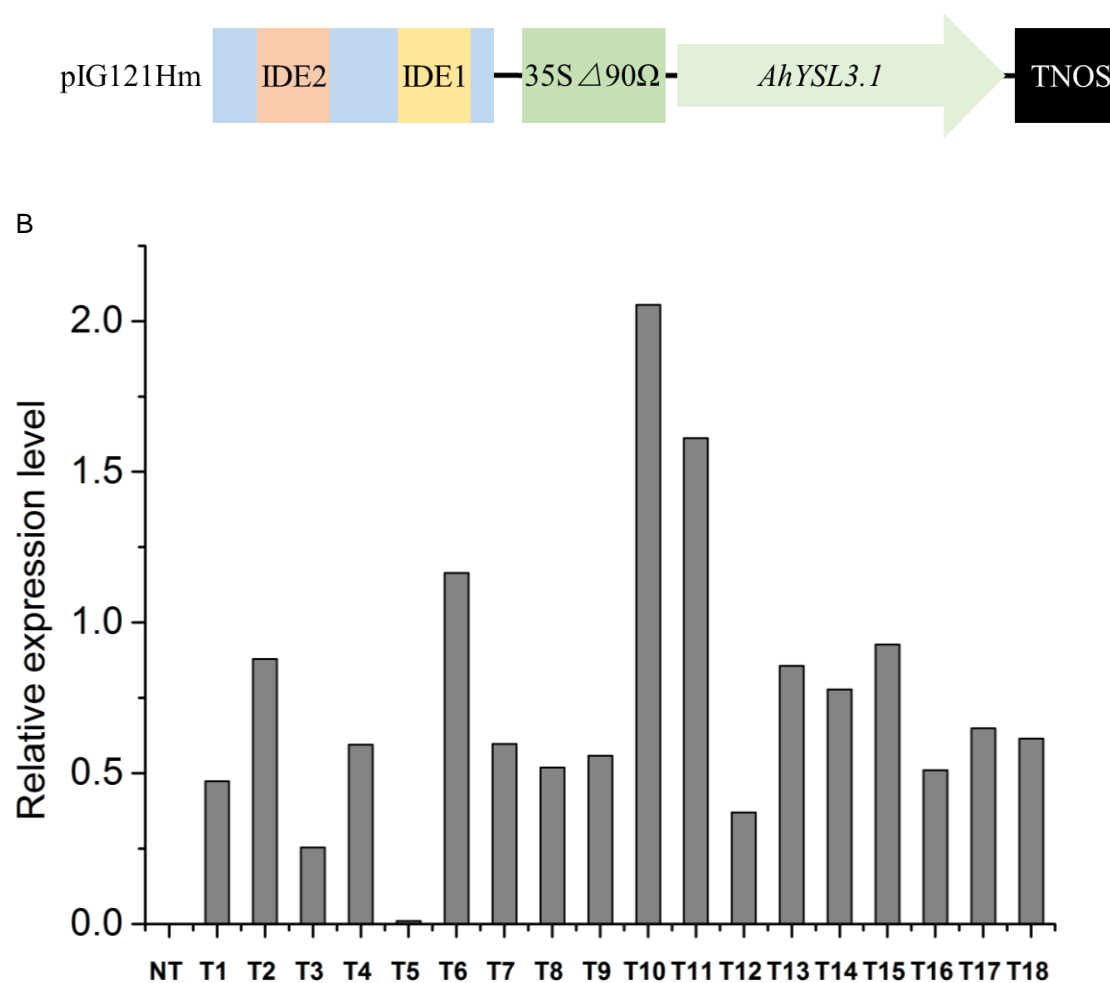

Supplementary Fig. S2 Generation of *AhYSL3.1*-induced transgenic plants. (A) Schematic diagram of the binary vector for induction of AhIRT1 expression. Expression of the *AhYSL3.1* gene was driven by an artificial promoter containing IDE1 and IDE2, which are cis-acting elements conferring Fe-deficiency-specific expression in tobacco roots, fused to the -90/+8 region of the cauliflower mosaic virus 35S promoter and a 5' leader ( $\Omega$ ) sequence of the tobacco mosaic virus to enhance basal expression (Kobayashi et al., 2003; Kobayashi et al., 2004). The pIG121Hm vector was used as a backbone. TNOS is the terminator of the nopaline synthase gene. (B) *AhYSL3.1* expression levels in shoots of the NT and transgenic lines. NT, non-transformed plants; T1–T18, transgenic lines.

**Supplementary Fig. S3**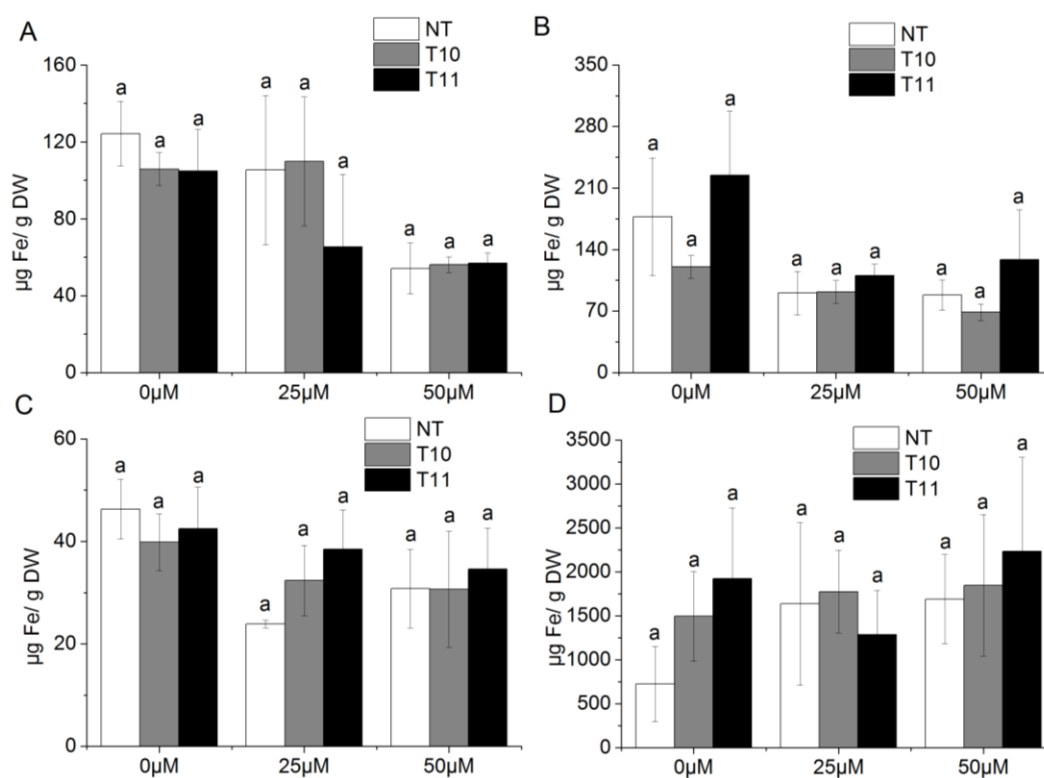

Supplementary Fig. S3 Fe concentrations in the NT and transgenic lines treated with various concentrations of Cu. (A) Young leaves, (B) old leaves, (C) stems, and (D) roots.

Supplementary Fig. S4

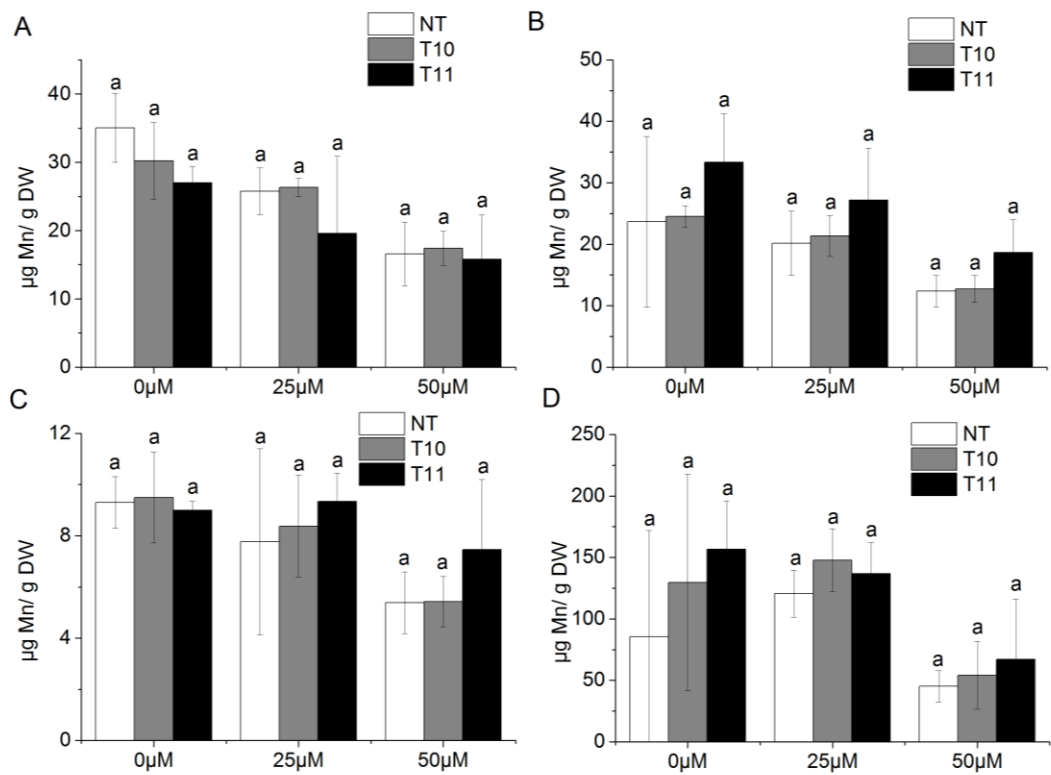

Supplementary Fig. S4 Mn concentrations in the NT and transgenic lines treated with various concentrations of Cu. (A) Young leaves, (B) old leaves, (C) stems, and (D) roots.

**Supplementary Fig. S5**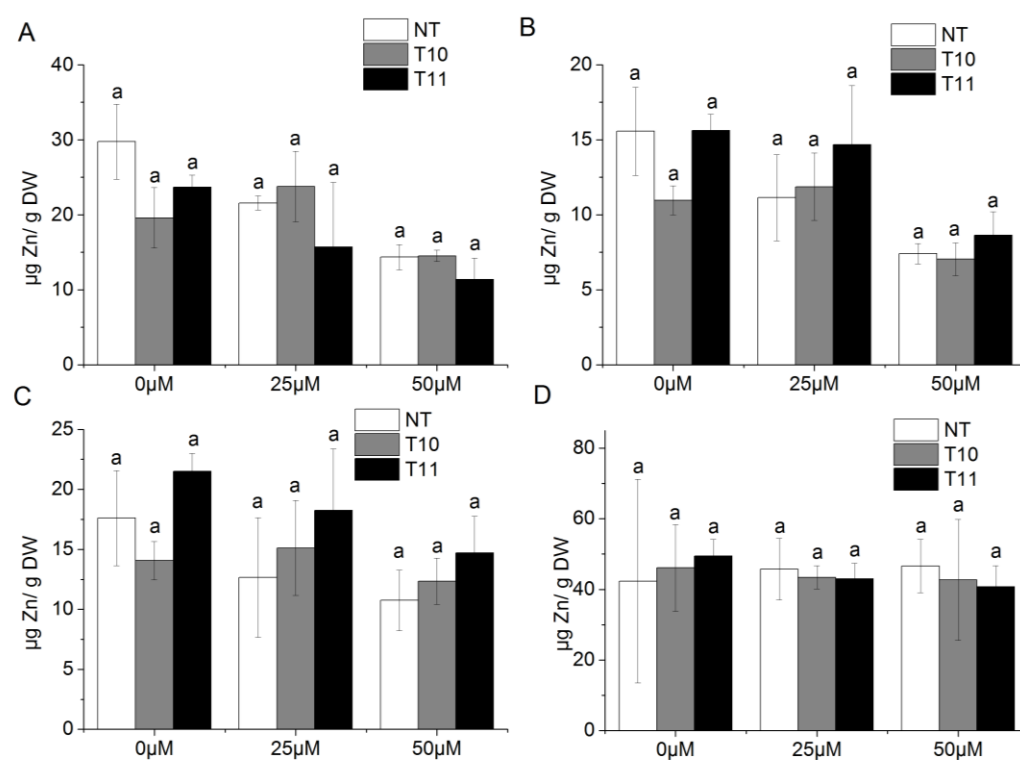

Supplementary Fig. S5 Zn concentrations in the NT and transgenic lines treated with various concentrations of Cu. (A) Young leaves, (B) old leaves, (C) stems, and (D) roots.

**Supplementary Fig. S6**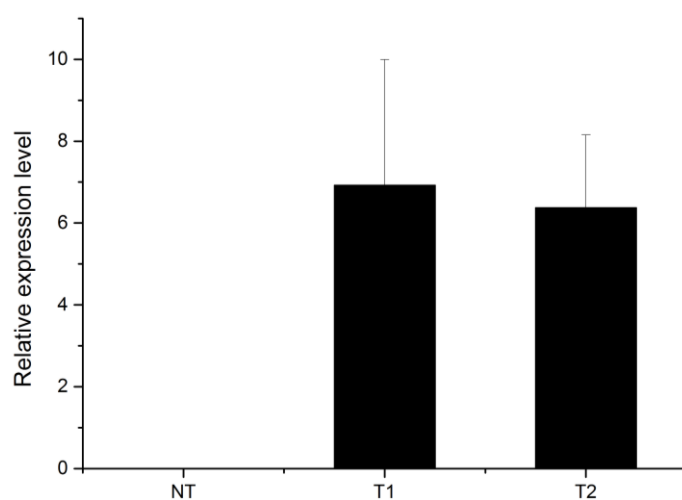

Supplementary Fig. S6 Relative expression level of *AhYSL3.1* in young leaves of NT and transgenic rice plants under excess Cu conditions.

**Supplementary Fig. S7**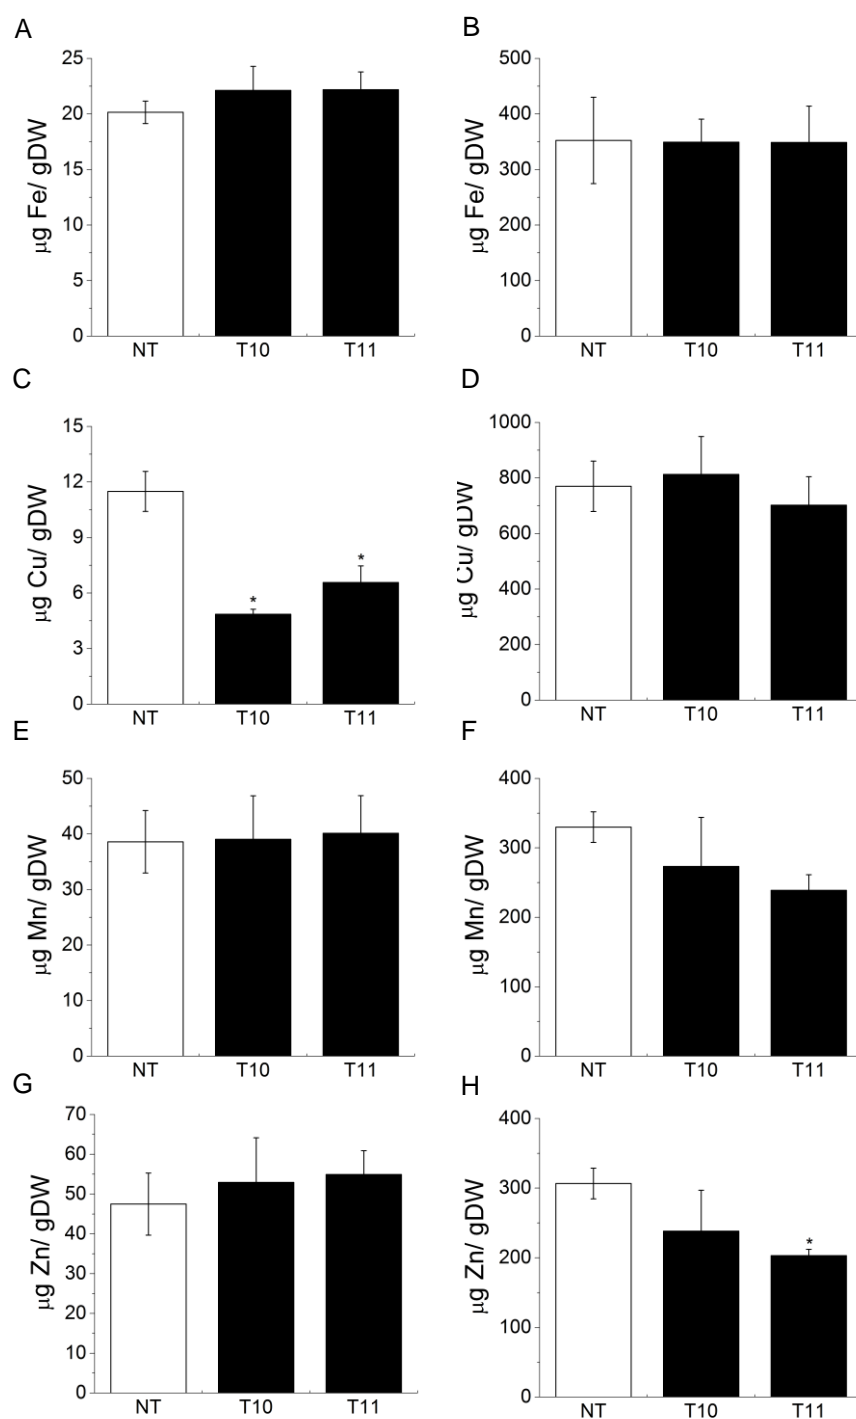

Supplementary Fig. S7 Metal concentrations in young leaves and roots of transgenic and NT tobacco plants under Fe-deficient conditions. The tobacco plants were Fe-deprived for 9 days. (A, B) Fe, (C, D) Cu, (E, F) Mn, and (G, H) Zn concentrations in new leaves (A, C, E, G) and roots (B, D, F, H) of NT and transgenic plants. Results are presented as means  $\pm$  SD of triplicate samples. Significant differences from NT were determined by Student's *t*-test, \* $P < 0.05$ .

**Supplementary Fig. S8**

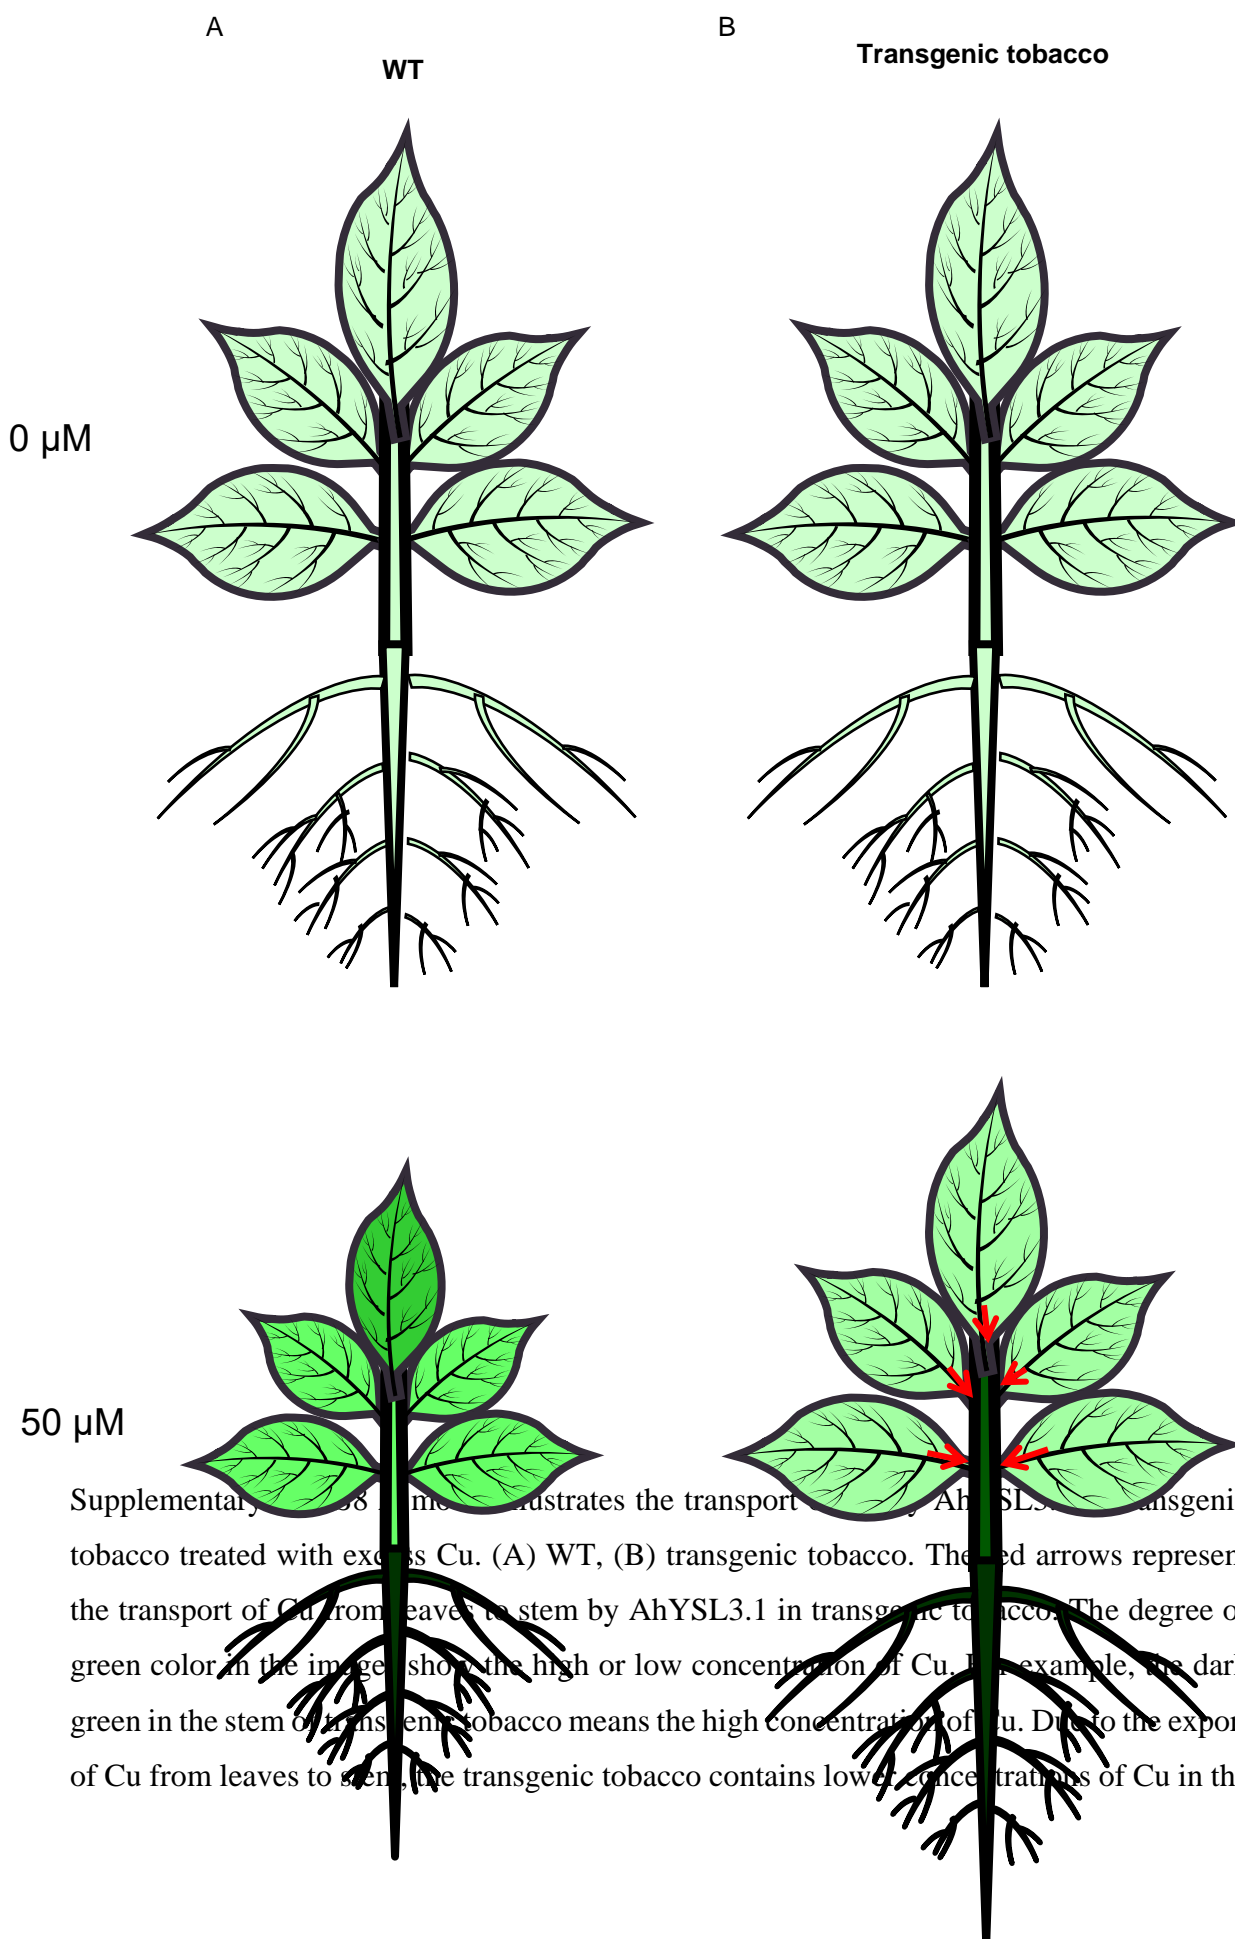



leaves and higher concentrations of Cu in the stem compared to the WT in the excess Cu condition. Thus, the transgenic plants are tolerant to excess Cu.
